# Supplementary material for: Discovery of a novel ROCK2 inhibitor with anti-migration effects via docking and high-content drug screening
Source: Royal Society of Chemistry journal article supplement (doi:10.1039/c6mb00343e), 2016-05-31
Supplement: c6mb00343e1.pdf [file c6mb00343e1.pdf]

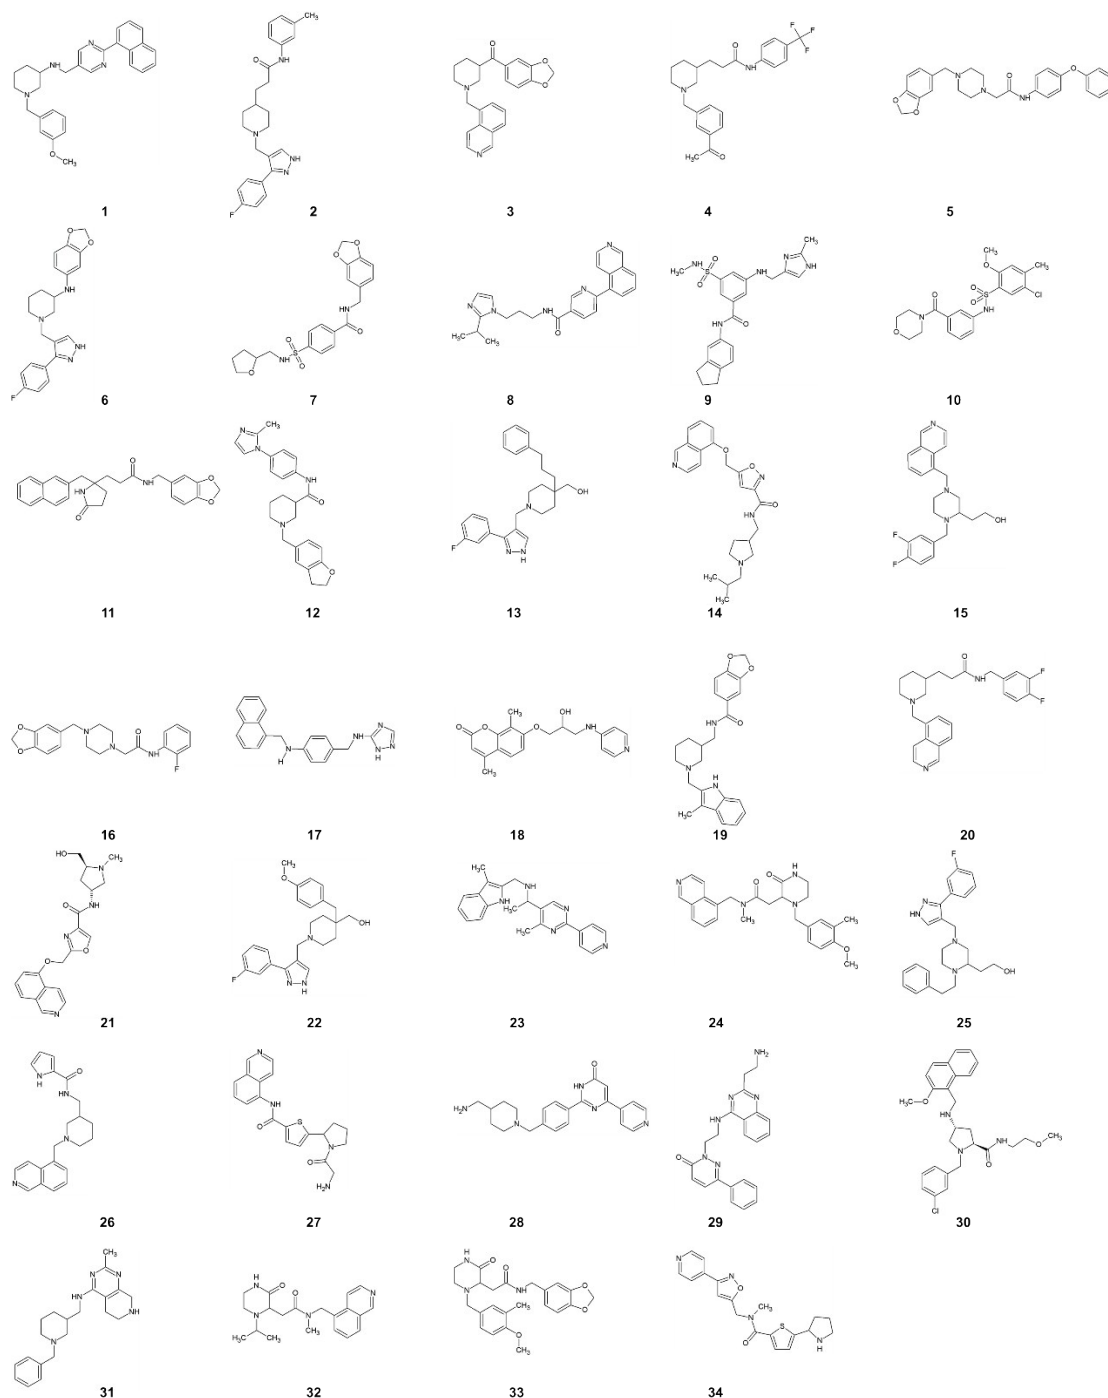

**Fig. S1.** The structures of the 34 diverse compounds.

| Compounds | Docking Score |
|-----------|---------------|
| H1152     | -11.9         |
| 1         | -12.6         |
| 2         | -12.3         |
| 3         | -12.2         |
| 4         | -12.2         |
| 5         | -12.1         |
| 6         | -11.9         |
| 7         | -11.9         |
| 8         | -11.7         |
| 9         | -11.7         |
| 10        | -11.7         |
| 11        | -11.7         |
| 12        | -11.6         |
| 13        | -11.6         |
| 14        | -11.1         |
| 15        | -11.1         |
| 16        | -11.0         |
| 17        | -10.9         |
| 18        | -10.8         |
| 19        | -13.1         |
| 20        | -12.7         |
| 21        | -12.2         |
| 22        | -12.1         |
| 23        | -12.0         |
| 24        | -11.7         |
| 25        | -11.5         |
| 26        | -11.3         |
| 27        | -11.3         |
| 28        | -11.2         |
| 29        | -11.1         |
| 30        | -11.1         |
| 31        | -11.0         |
| 32        | -10.9         |
| 33        | -10.8         |
| 34        | -10.8         |

**Fig. S2.** The docking score of compound candidates.
